# Supplementary material for: Enhanced interactions of excitonic complexes in free-standing WS2
Source: Royal Society of Chemistry journal article supplement (doi:10.1039/d3nr04594c), 2023-01-01
Supplement: d3nr04594c1.pdf [file d3nr04594c1.pdf]

**Supplementary Information for**

**Enhanced Interactions of Excitonic Complexes in Free-standing WS<sub>2</sub>**

Xueqian Sun<sup>1</sup>, Zhuoyuan Lu<sup>1</sup> and Yuerui Lu<sup>1,2\*</sup>

<sup>1</sup>School of Engineering, College of Engineering and Computer Science, the Australian National University, Canberra, ACT, 2601, Australia

<sup>2</sup>Australian Research Council Centre of Excellence for Quantum Computation and Communication Technology, the Australian National University, Canberra, ACT, 2601 Australia

\* To whom correspondence should be addressed: Yuerui Lu ([yuerui.lu@anu.edu.au](mailto:yuerui.lu@anu.edu.au))

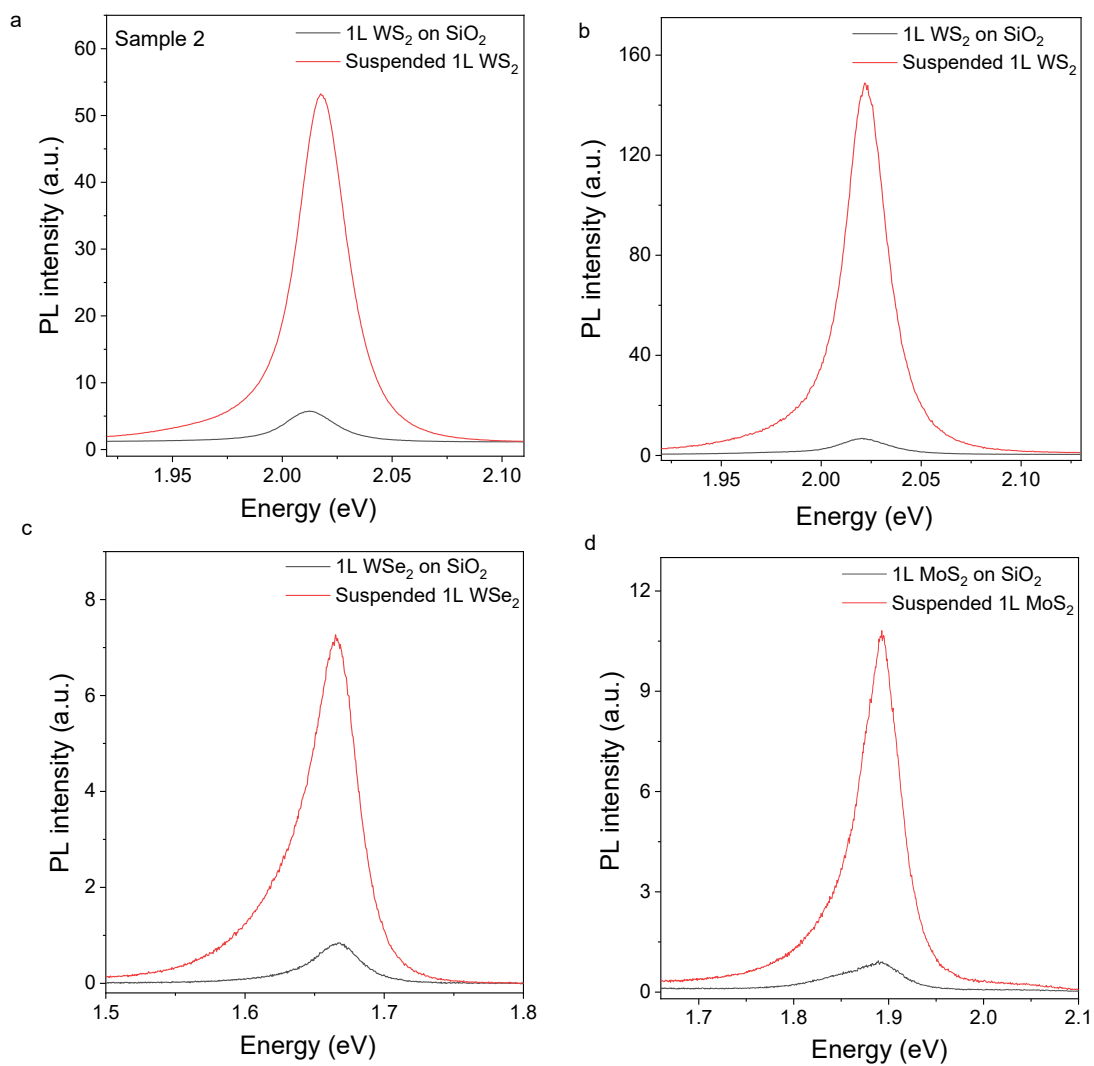

**Supplementary Figure S1** | Measured PL spectra from 1L SiO<sub>2</sub>-supported and suspended monolayer WS<sub>2</sub> sample 2 (a) and sample 3 (b), monolayer WSe<sub>2</sub> sample (c) and monolayer MoS<sub>2</sub> sample (d) at room temperature.

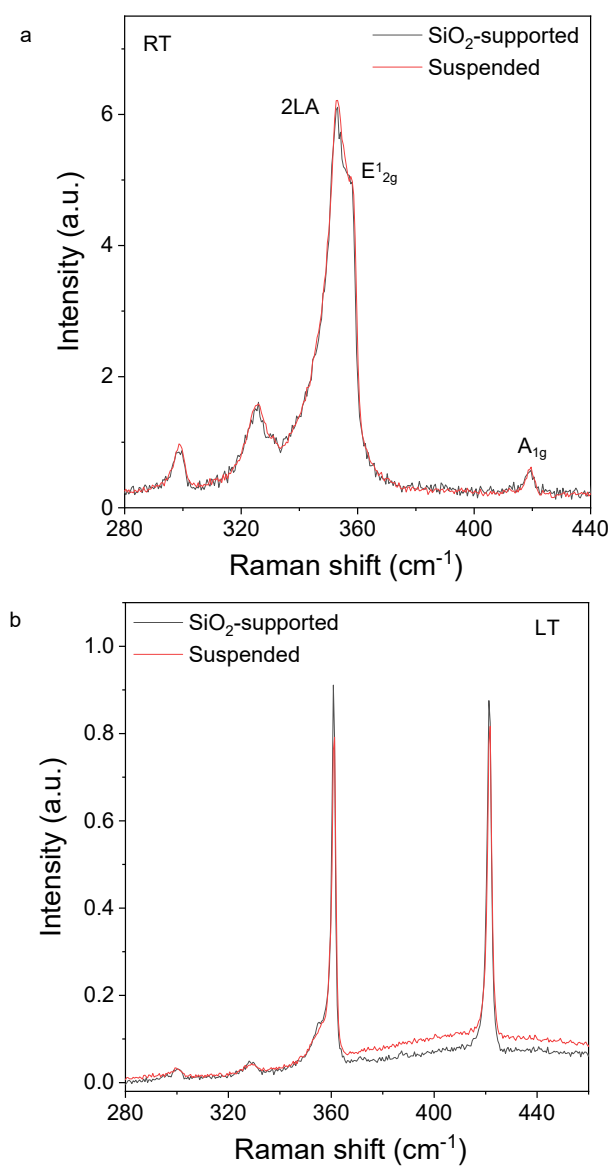

**Supplementary Figure S2** | Measured Raman spectra from 1L SiO<sub>2</sub>-supported and suspended monolayer WS<sub>2</sub> at room temperature **(a)** and 83K **(b)**.

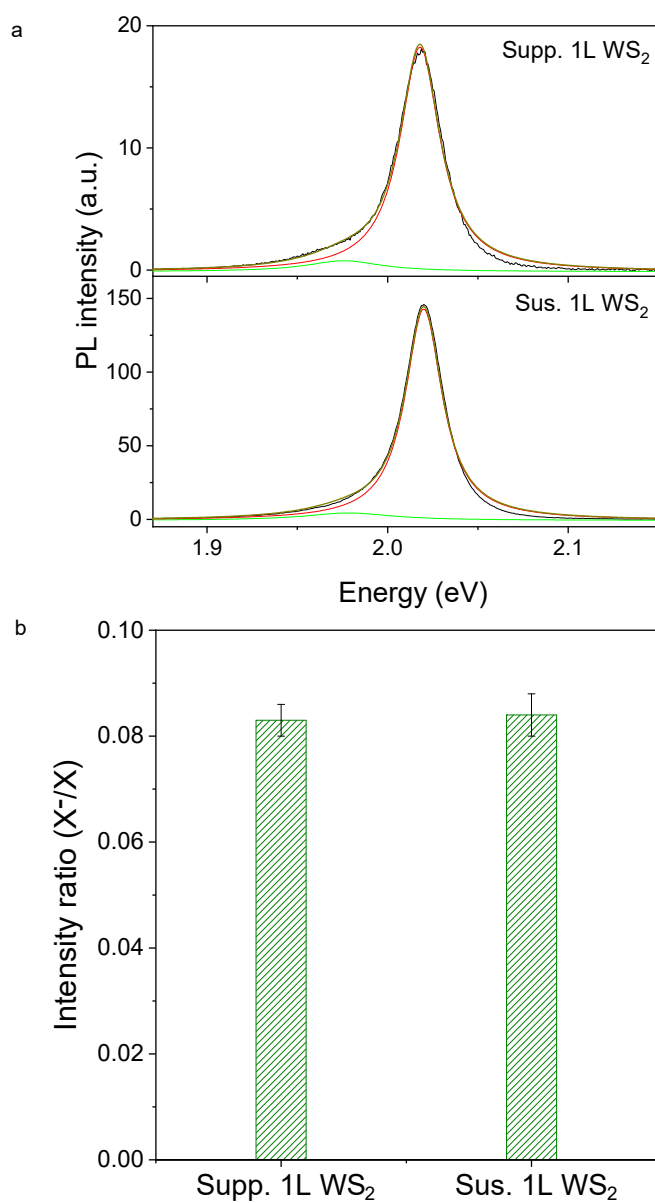

**Supplementary Figure S3** | **a**, Measured PL spectra from the SiO<sub>2</sub>-supported (top panel) and suspended (bottom panel) monolayer WS<sub>2</sub> at room temperature. The spectrum was fitted with trion (green curve) and exciton (red curve) peaks. Black and dark yellow curves are experimental data and accumulative fitting curve, respectively. **b**, The extracted intensity ratio of trion ( $X^-$ ) to exciton ( $X$ ) for SiO<sub>2</sub>-supported and suspended monolayer samples, indicating the value of around  $0.083 \pm 0.003$  and  $0.084 \pm 0.004$ , respectively.

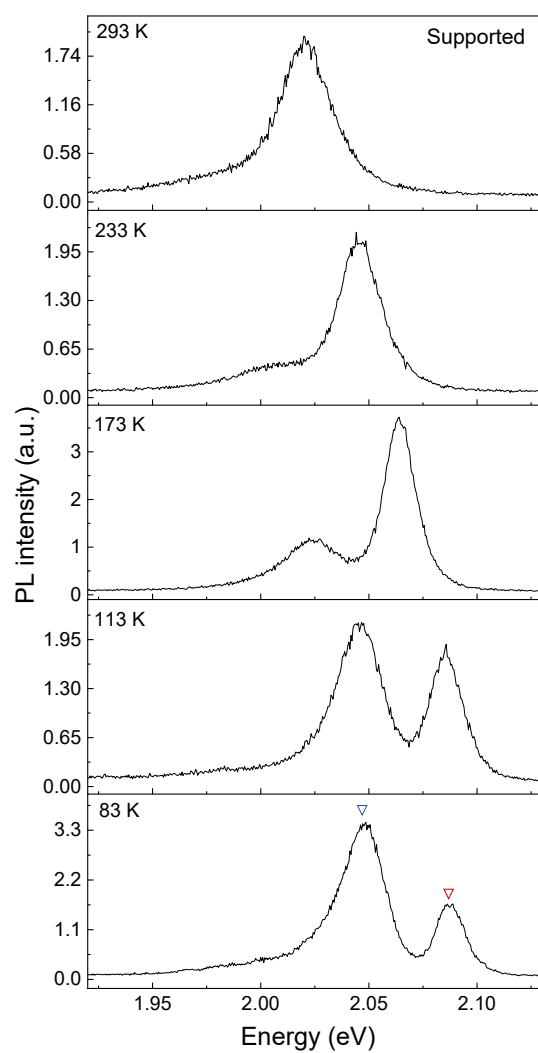

**Supplementary Figure S4** | Measured temperature-dependent PL spectra from a SiO<sub>2</sub>-supported WS<sub>2</sub> monolayer, under an excitation power of 0.3  $\mu$ W with a 532 nm CW laser.

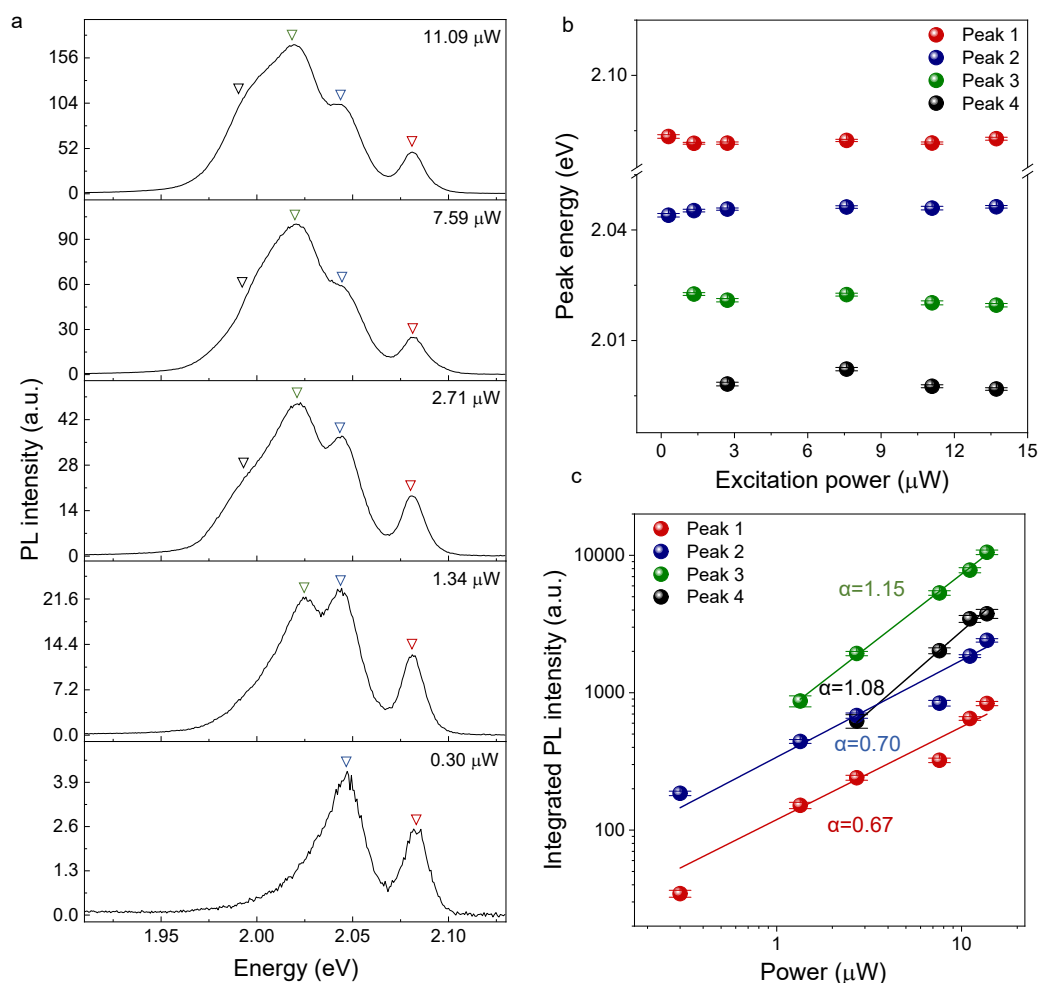

**Supplementary Figure S5 | Excitation power-dependent PL spectra from the SiO<sub>2</sub>-supported WS<sub>2</sub> monolayer at 83K** **a**, Measured excitation power dependent PL spectra from the SiO<sub>2</sub>-supported WS<sub>2</sub> monolayer with pumping power ranging from 0.3  $\mu$ W to 11.09  $\mu$ W. **b**, Extracted peak energy of exciton peaks as a function of excitation power. **c**, Extracted integrated PL intensity of the exciton peaks as a function of excitation power. The fitting curves give rise to a slope of 0.67, 0.70, 1.15 and 1.08 for Peak 1 to peak 4, respectively. The error bars in **(b)** and **(c)** represent the fitting uncertainty obtained from multiple fitting analysis ( $>3$ ).

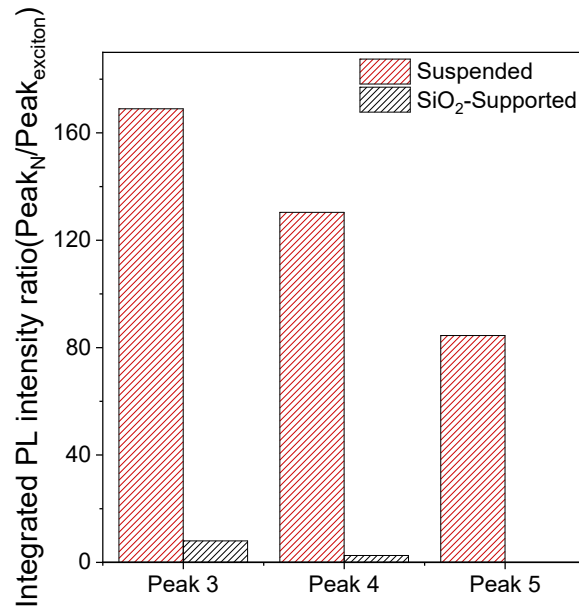

**Supplementary Figure S6** | Extracted PL intensity ratio ( $\eta$ ) of additional emission peaks from samples with different dielectric screening, suspended and SiO<sub>2</sub>-supported structures, using the measured PL spectra displayed in Figure 3a and S5a at the same excitation power of 2.71  $\mu$ W.

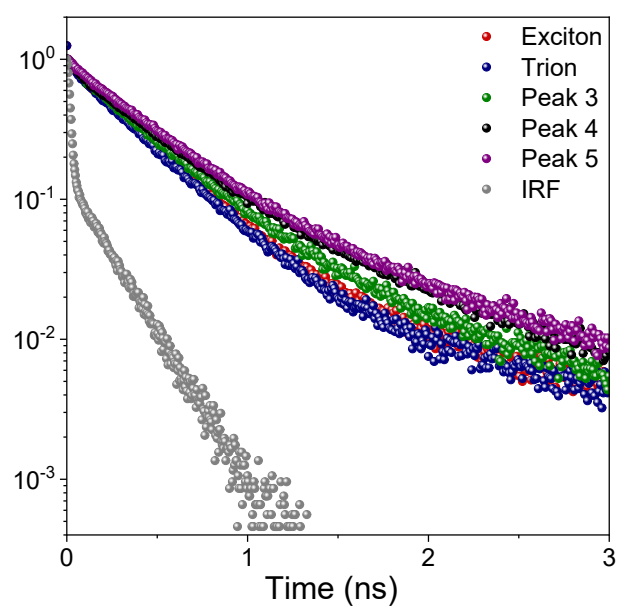

**Supplementary Figure S7 |** Time-resolved PL emission (normalized) obtained from different emission peaks from freestanding WS<sub>2</sub> monolayer at 83K. The decay curve was fitted by deconvoluting the data from the instrument response function (IRF), yielding a lifetime of 377 ps, 368 ps, 476 ps, 524 ps and 552 ps, for exciton (red), trion (blue), biexciton quasiparticles (green, black and purple), respectively.

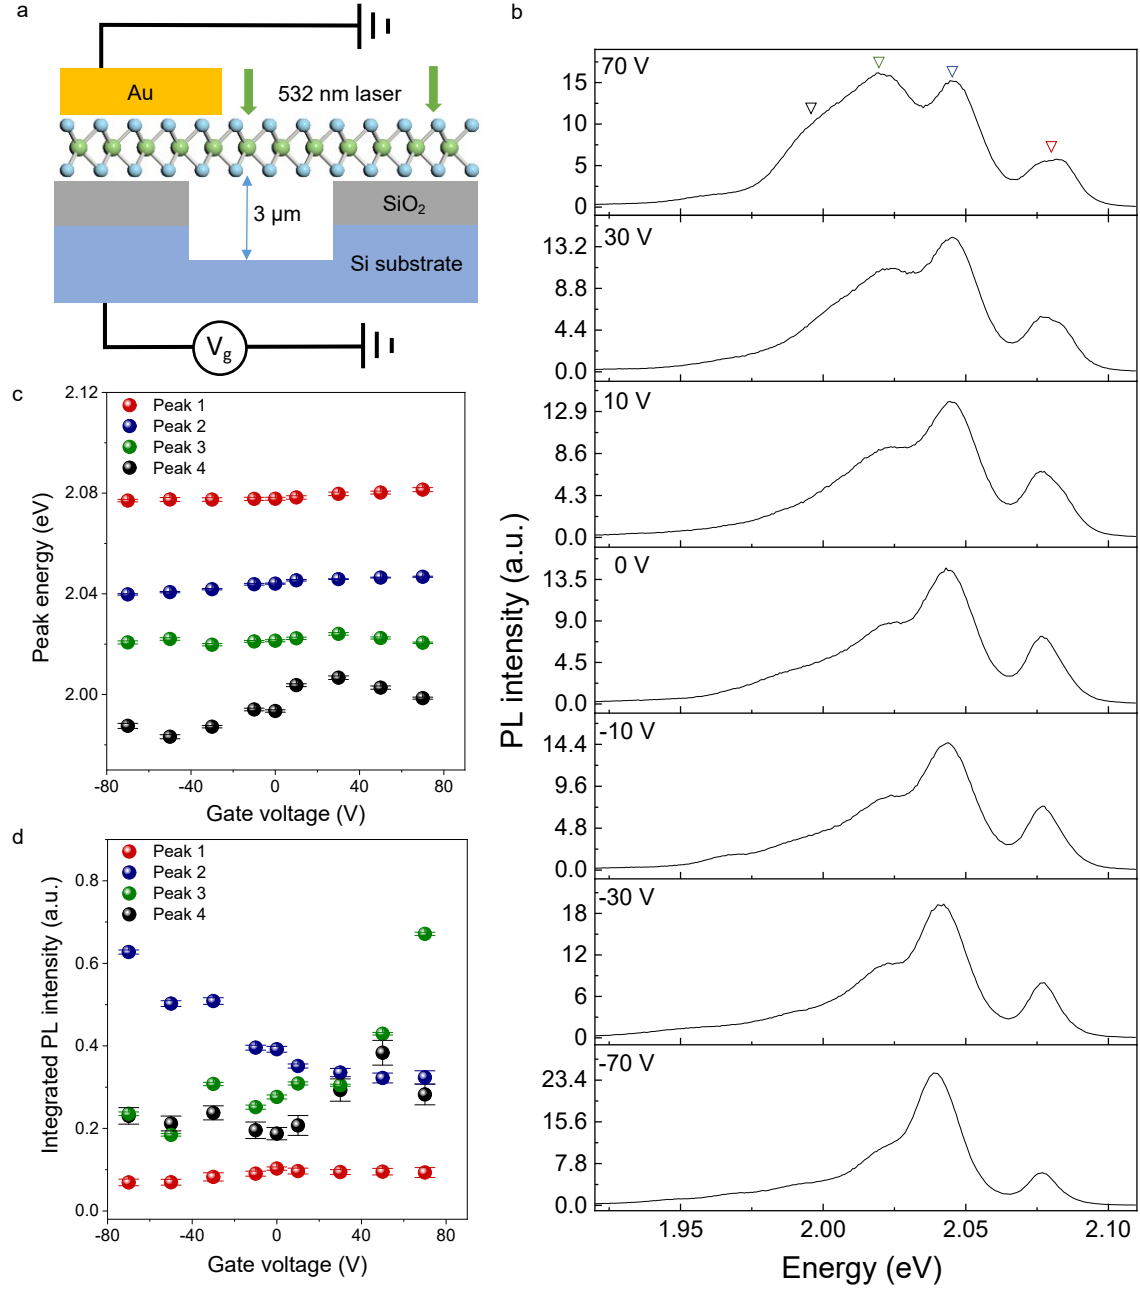

**Supplementary Figure S8 | Electrical modulation of the exciton dynamics for SiO<sub>2</sub>-supported WS<sub>2</sub> monolayer at 83K** **a**, Schematic plot of a 1L WS<sub>2</sub> device structure, showing the sample used for modulating the doping in both freestanding and SiO<sub>2</sub>-supported monolayer using back gate voltage. The gold electrode was grounded, covering both supported and freestanding samples, and a doped Si substrate was employed as the back gate to provide uniform electrostatic doping. **b**, Measured gate dependent PL spectra from a SiO<sub>2</sub>-supported WS<sub>2</sub> monolayer at 83 K with gate tuning changing from 70 to -70V. **c**, Extracted peak energy of exciton peaks as a function of back gate voltages. **d**, Extracted integrated PL intensity of the exciton peaks as a function of back gate voltages. The error bars in (c) and (d) represent the fitting uncertainty obtained from multiple fitting analysis (>3).
